# Supplementary material for: Identification of key candidate genes and pathways in oral squamous cell carcinoma by integrated Bioinformatics analysis
Source: PubMed Central journal article supplement — Exp Ther Med. 2019 Mar 26;17(5):4089–99. doi: 10.3892/etm.2019.7442 (PMC6468404; doi:10.3892/etm.2019.7442), 2019-03-26

Figure S1. Assessment of transfection efficiency of CAL-27 cells by fluorescence microscopy. Groups: Control, empty control with no treatment; sh-NC, CAL-27 cells transfected with negative control lentivirus; sh-SPP1, CAL-27 cells with SPP1 knock-down; sh-PLAU, CAL-27 cells with PLAU knockdown; sh-ITGA3, CAL-27 cells with ITGA3 knockdown. SPP1, secreted phosphoprotein 1; ITGA3, integrin subunit  $\alpha$  3; PLAU, plasminogen activator, urokinase; GFP, green fluorescence protein. Scale bar, 100  $\mu$ m.

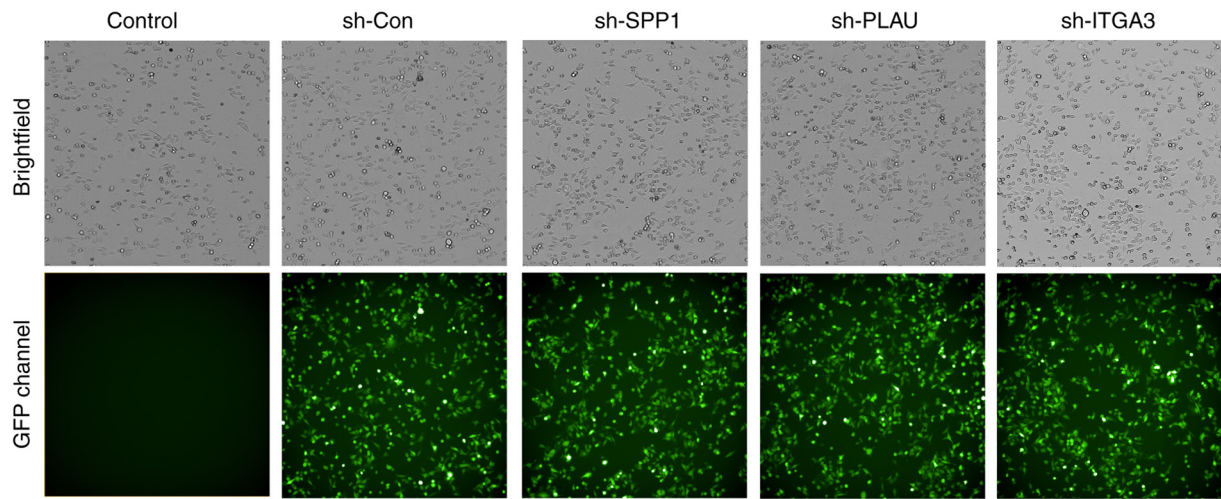

Supplement: Supplementary_Data.pdf [file Supplementary_Data.pdf]
